# Supplementary material
Source: PubMed Central journal article supplement (PMC2823887)
Supplement: 0913873107_pnas.200913873SI.pdf [file 0913873107_pnas.200913873SI.pdf]

# Supporting Information

Lawson et al. 10.1073/pnas.0913873107

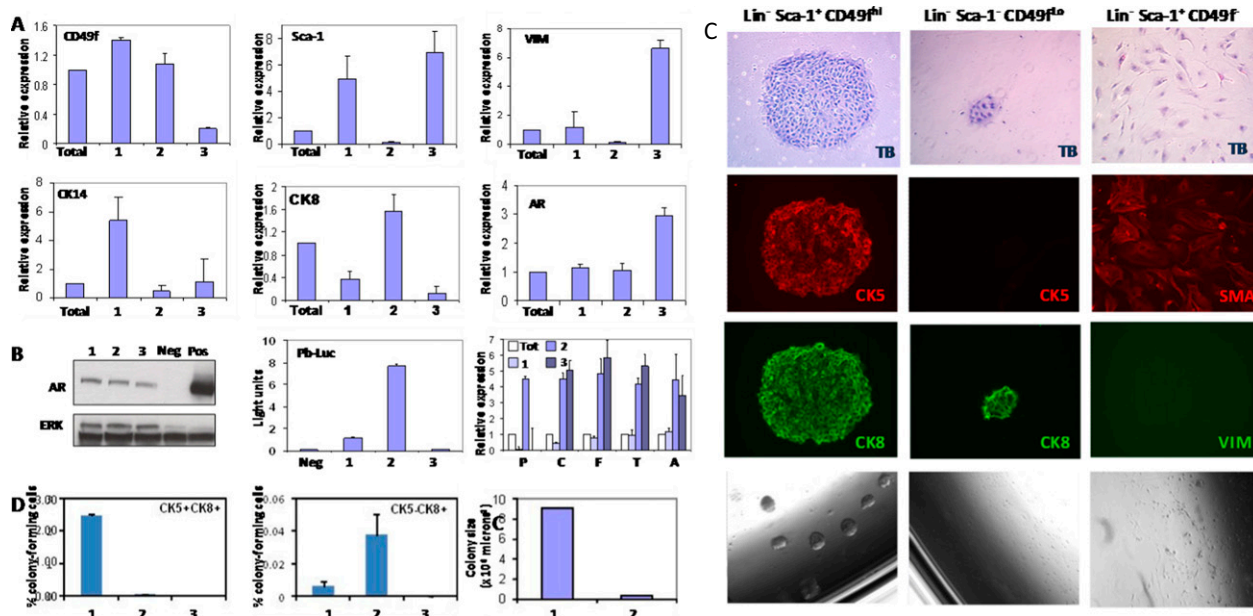

**Fig. S1.** Basal/stem, luminal, and stromal cells have distinct phenotypic and functional properties. (A) qPCR analysis for expression of prostate lineage markers in each population. Expression is relative to total unsorted prostate cells. (B) Western blot (Left) analysis for androgen receptor (AR) in each population. Neg, negative control, PC3 cell lysate; Pos, positive control, LNCaP cell lysate. (Center) Luciferase assay for expression of the enzyme in each population of cells isolated from ARR2 Pb-Luc transgenic mice. (Right) The relative expression of a series of androgen-regulated genes in each fraction by qPCR analysis (P, probasin; C, calreticulin; F, FKBP51; T, TMEFF2; A, aquaporin 5). Data are shown as expression level relative to total unsorted prostate cells. (C) Prostate cells were sorted into each fraction and plated in the in vitro colony- and sphere-forming assays. Staining with trypan blue (TB) and antibodies against CK5, CK8, Vimentin (VIM), and SMA on representative colonies from each fraction are shown. Bottom panels show overview images of spheres on Day 10 of culture. (Original magnification: 100x.) (D) Serial dilutions of prostate cells (1,000–50,000) from each fraction were plated in the colony assay and the number of each type of colony was counted 8 days later. Graphs show the efficiency of each population for forming primitive CK5+CK8+ (Left) and mature CK5-CK8+ (Center) colonies. The Right graph shows the average area of CK5+CK8+ and CK5-CK8+ colonies.

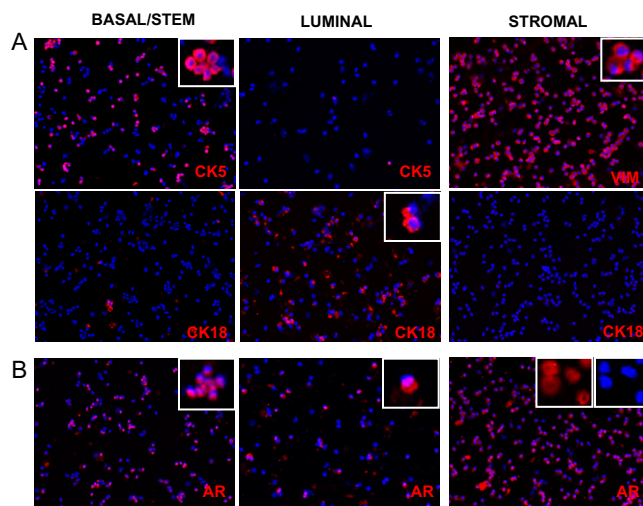

**Fig. S2.** Immunocytochemical analysis of prostate lineage marker expression in basal/stem, luminal, and stromal cell fractions. (A) Cytospins of sorted prostate basal/stem, luminal, and stromal cell fractions were stained with antibodies against CK5, CK18, and VIM (Original magnification: 10x.) Insets show higher power view of individual cells. (B) Cytospins of each fraction were stained with antibody against AR. (Original magnification, 10x.) Insets show higher power view for examination of nuclear versus cytoplasmic expression of the receptor in individual cells.



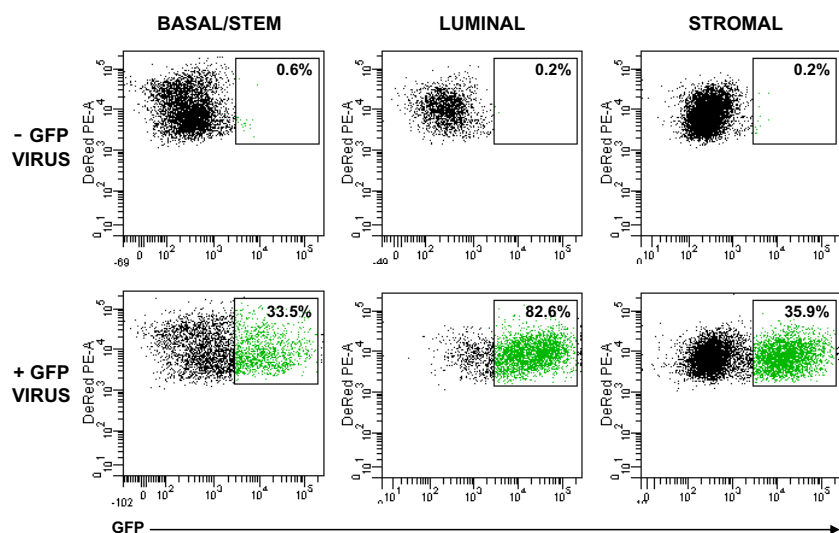

**Fig. S5.** Basal/stem, luminal, and stromal cells are competent for lentiviral-mediated gene transfer. 100,000  $\text{Lin}^{-}\text{Sca-1}^{+}\text{CD49}^{\text{hi}}$  (basal/stem),  $\text{Lin}^{-}\text{Sca-1}^{-}\text{CD49}^{\text{lo}}$  (luminal), and  $\text{Lin}^{-}\text{Sca-1}^{+}\text{CD49}^{-}$  (stromal) cells were mock transduced ( $-$  GFP virus) or transduced with GFP lentivirus ( $+$  GFP virus) and implanted in the prostate regeneration assay for 1 week. Harvested grafts were digested and analyzed by flow cytometry for GFP expression.

**Table S1. Primer sequences for qPCR experiments**

| Gene              | Sequence                                                           |
|-------------------|--------------------------------------------------------------------|
| <i>Actin</i>      | (5'GATCTGGCACCACCTTCT3') and (5'GGGGTGTGAAGGTCTCAA3')              |
| <i>CD49f</i>      | (5'ATGGAAGCCCTCAG3') and (5'CTCTCAACTGCAGC3')                      |
| <i>Sca-1</i>      | (5'TCAGAGCAAGGTCT) and (5'ATGGACTTCTCA3')                          |
| <i>Vimentin</i>   | (5'TCAGAGCAAGGTCT) and (5'ATGGACTTCTCA3')                          |
| <i>Keratin 5</i>  | (5'TCAGAGCAAGGTCT) and (5'ATGGACTTCTCA3')                          |
| <i>Keratin 14</i> | (5'CCTCTGGCTCTCAGTCATCC3') and (5'GAGCAGCATGTAGCAGCTT3')           |
| <i>DeltaNp63</i>  | (5'GAGAGAGGGCATCAAAGGTG3') and (5'GAAAAAATGCCAGACTC3')             |
| <i>NKX3.1</i>     | (5'CTCCAGAGCCCGACAAAG3') and (5'CACTTGCTAAGTCCCTGGA3')             |
| <i>Keratin 8</i>  | (5'ATCGAGATCAACCCTACCG3') and (5'CTGAAGCCAGGGCTAGTGAG3')           |
| <i>Keratin 18</i> | (5'AAGGTGAAGCTTGAGGCAGA3') and (5'CTGCACAGTTTGATGGAGT3')           |
| <i>FGFR1</i>      | (5'CACTTTGGTCACCGTTGGGTTT3') and (5'AGATGAAGAGCGGCACCAAGAAGA3')    |
| <i>FGFR2</i>      | (5'AGAAGCGTACGTGGTTGCC3') and (5'GCTCCTGCTTAAACTCCTC3')            |
| <i>Probasin</i>   | (5'ATCATCTTCTGCTCACACTGCATG3') and (5'ACAGTTGTCGGTGTCCATGATACGC3') |

**Table S2. Antibodies used for FACS, IHC, and ICC**

| Antibodies                                 | Dilution and source                         |
|--------------------------------------------|---------------------------------------------|
| FACS antibodies                            |                                             |
| PE anti-CD49f                              | 1:250 (eBioscience)                         |
| APC anti-Sca-1                             | 1:1000 (eBioscience)                        |
| FITC anti-Ter119                           | 1:250 (eBioscience)                         |
| FITC anti-CD45                             | 1:250 (eBioscience)                         |
| FITC anti-CD31                             | 1:250 (eBioscience)                         |
| IHC and ICC primary antibodies             |                                             |
| Rabbit polyclonal anti-AR                  | 1:200 (Santa Cruz Biotechnology)            |
| Mouse monoclonal anti-p63                  | 1:200 (Santa Cruz Biotechnology, clone 4A4) |
| Mouse monoclonal anti-cytokeratin 8        | 1:1000 (Covance, clone 1E8)                 |
| Rabbit polyclonal anti-cytokeratin 5       | 1:1000 (Covance)                            |
| Rabbit polyclonal anti-cytokeratin 18      | 1:200 (Proteintech Group, Inc.)             |
| Chicken anti-vimentin                      | 1:200 (Abcam)                               |
| IHC and ICC secondary antibodies           |                                             |
| Alexa Fluor 594 goat anti-rabbit IgG (H+L) | 1:1000 (Molecular Probes)                   |
| Alexa Fluor 488 goat anti-mouse IgG (H+L)  | 1:1000 (Molecular Probes)                   |
| Biotinylated polyclonal goat anti-mouse    | 1:250 (DakoCytomation)                      |
| Polyclonal goat anti-rabbit                | 1:250 (DakoCytomation)                      |
| Streptavidin-FITC                          | 1:1000 (Invitrogen)                         |
| Streptavidin-Alexa594                      | 1:1000 (Invitrogen)                         |

APC, adenomatous polyposis coli; ICC, immunocytochemical; IHC, immunohistochemical.
